# Supplementary material
Source: HighWire-hosted journal article supplement (https://www.cmajopen.ca/highwire/filestream/89774/field_highwire_adjunct_files/0/open-2021-0203-1-at.pdf)
Supplement: open-2021-0203-1-at.pdf [file open-2021-0203-1-at.pdf]

Appendix 1: Search strategies for Embase (Ovid) and Medline (Ovid)

Database: Ovid Embase <1974 to 2022 January 03>

-----  
1 (academic adj5 "half day\*").mp. (129)

2 (noon adj5 conference\*).mp. (196)

3 1 or 2 (311)

4 (classroom adj3 learning).mp. (1111)

5 didactic conference\*.mp. (106)

6 daily lecture\*.mp. (22)

7 educational conference\*.mp. (475)

8 morning conference\*.mp. (24)

9 resident lecture\*.mp. (40)

10 or/4-9 (1773)

11 residency education/ (30272)

12 resident\*.mp. (292986)

13 11 or 12 (307422)

14 10 and 13 (362)

15 3 or 14 (651)

\*\*\*\*\*

Database: Ovid MEDLINE(R) and Epub Ahead of Print, In-Process, In-Data-Review &  
Other Non-Indexed Citations, Daily and Versions(R) <1946 to January 03, 2022>

- 
1. (academic adj5 "half day\*").mp. (42)
  2. (noon adj5 conference\*).mp. (60)
  3. 1 or 2 (96)
  4. (classroom adj3 learning).mp. (891)
  5. didactic conference\*.mp. (58)
  6. daily lecture\*.mp. (12)
  7. educational conference\*.mp. (268)
  8. morning conference\*.mp. (11)
  9. resident lecture\*.mp. (18)
  10. or/4-9 (1255)
  11. exp Education, Medical, Graduate/ (76650)
  12. resident\*.mp. (214555)
  13. 11 or 12 (262190)
  14. 10 and 13 (191)
  15. 3 or 14 (280)

\*\*\*\*\*
